# Supplementary material for: Impact of Developmental Age, Necrotizing Enterocolitis Associated Stress, and Oral Therapeutic Intervention on Mucus Barrier Properties
Source: PubMed Central journal article supplement (PMC7174379; doi:10.1038/s41598-020-63593-5), 2020-04-21
Supplement: 41598_2020_63593_MOESM1_ESM.pdf [file 41598_2020_63593_MOESM1_ESM.pdf]

**Impact of Developmental Age, Necrotizing Enterocolitis Associated Stress, and Oral  
Therapeutic Intervention on Mucus Barrier Properties**

Jaclyn Y. Lock<sup>1</sup>, Taylor L. Carlson<sup>2</sup>, Yueyue Yu<sup>3</sup>, Jing Lu<sup>3</sup>, Erika C. Claud<sup>3,4</sup>, Rebecca L.  
Carrier<sup>2\*</sup>

<sup>1</sup>Department of Bioengineering, Northeastern University, Boston, Massachusetts

<sup>2</sup>Department of Chemical Engineering, Northeastern University, Boston, Massachusetts

<sup>3</sup>Department of Pediatrics, Section of Neonatology, University of Chicago, Chicago, Illinois

<sup>4</sup>Department of Medicine, Section of Gastroenterology, University of Chicago, Chicago, Illinois

\*Corresponding Author, Email: [Rebecca@coe.neu.edu](mailto:Rebecca@coe.neu.edu)

**Supplemental Information:**

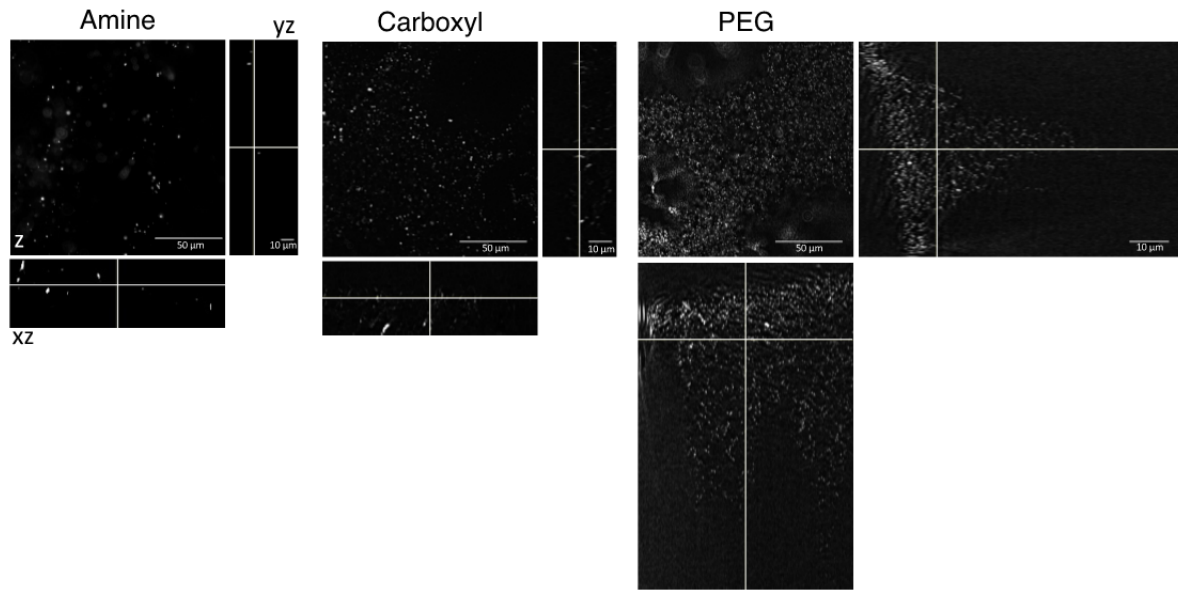

**Supplementary Fig S1:** Representative Z stack of amine-, carboxyl-, and PEG- modified particles in mucus 10 mins after adding particles to the mucosal surface. Images show a single Z slice (z) with corresponding orthogonal views (xz and yz). Intersection of lines designate the point in the z-stack that is being projected in the orthogonal view.

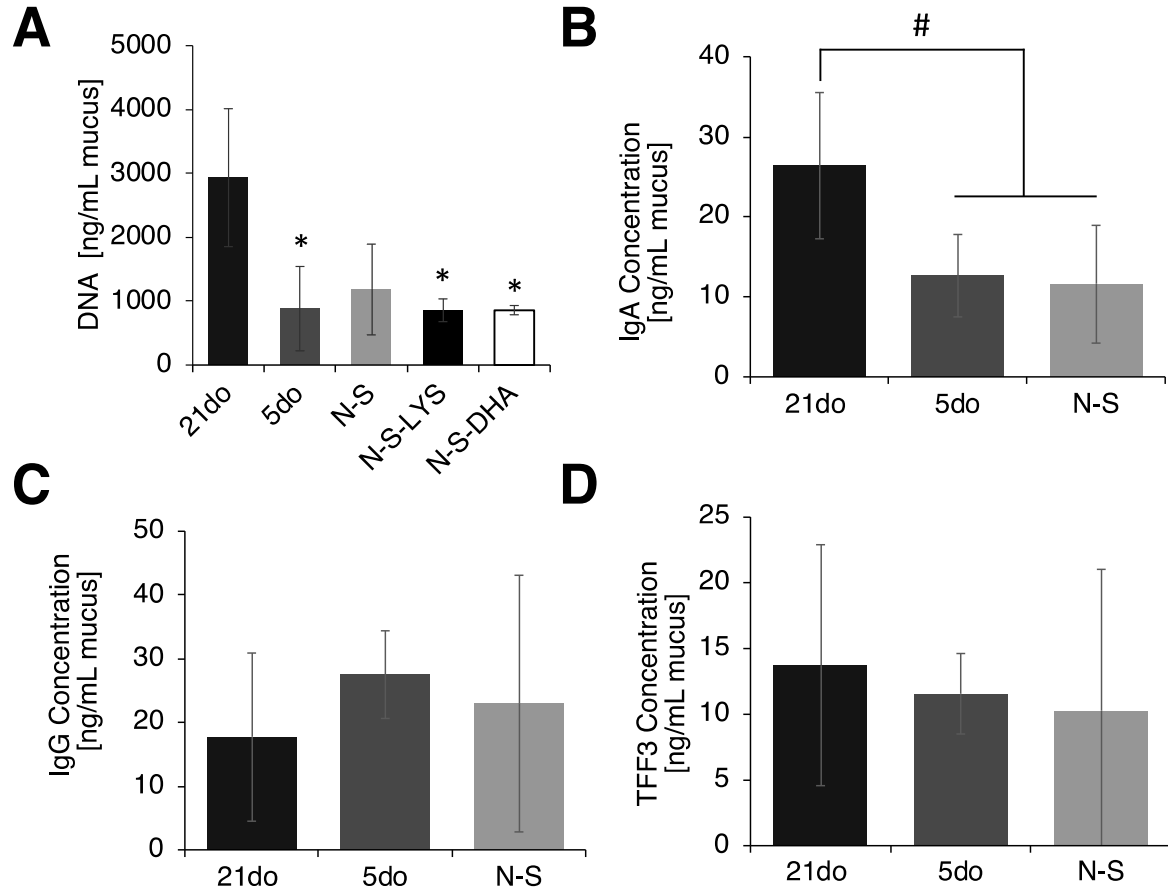

**Supplementary Fig S2:** (A) DNA amount per volume of mucus collected from 21do, 5do, NEC-stressed (N-S), NEC-stressed and orally dosed with LYS (N-S-LYS), and NEC-stressed and orally dosed with DHA (N-S-DHA) tissue. (B) Immunoglobulin A (IgA), (C) Immunoglobulin G (IgG), and (D) Trefoil factor 3 (TFF3) amount per volume of mucus collected from 21do, 5do, and N-S pups. ANOVA was used to determine significance in (A) \*  $p < 0.05$  comparing 21do to 5do, N-S-LYS, and N-S-DHA, and in (B) #  $p < 0.05$  comparing 21do to 5do and N-S.
